# Supplementary material for: A multiple kernel learning algorithm for drug-target interaction prediction
Source: Springer Nature journal article supplement (doi:10.1186/s12859-016-0890-3), 2016-01-22

Nuclear Receptors

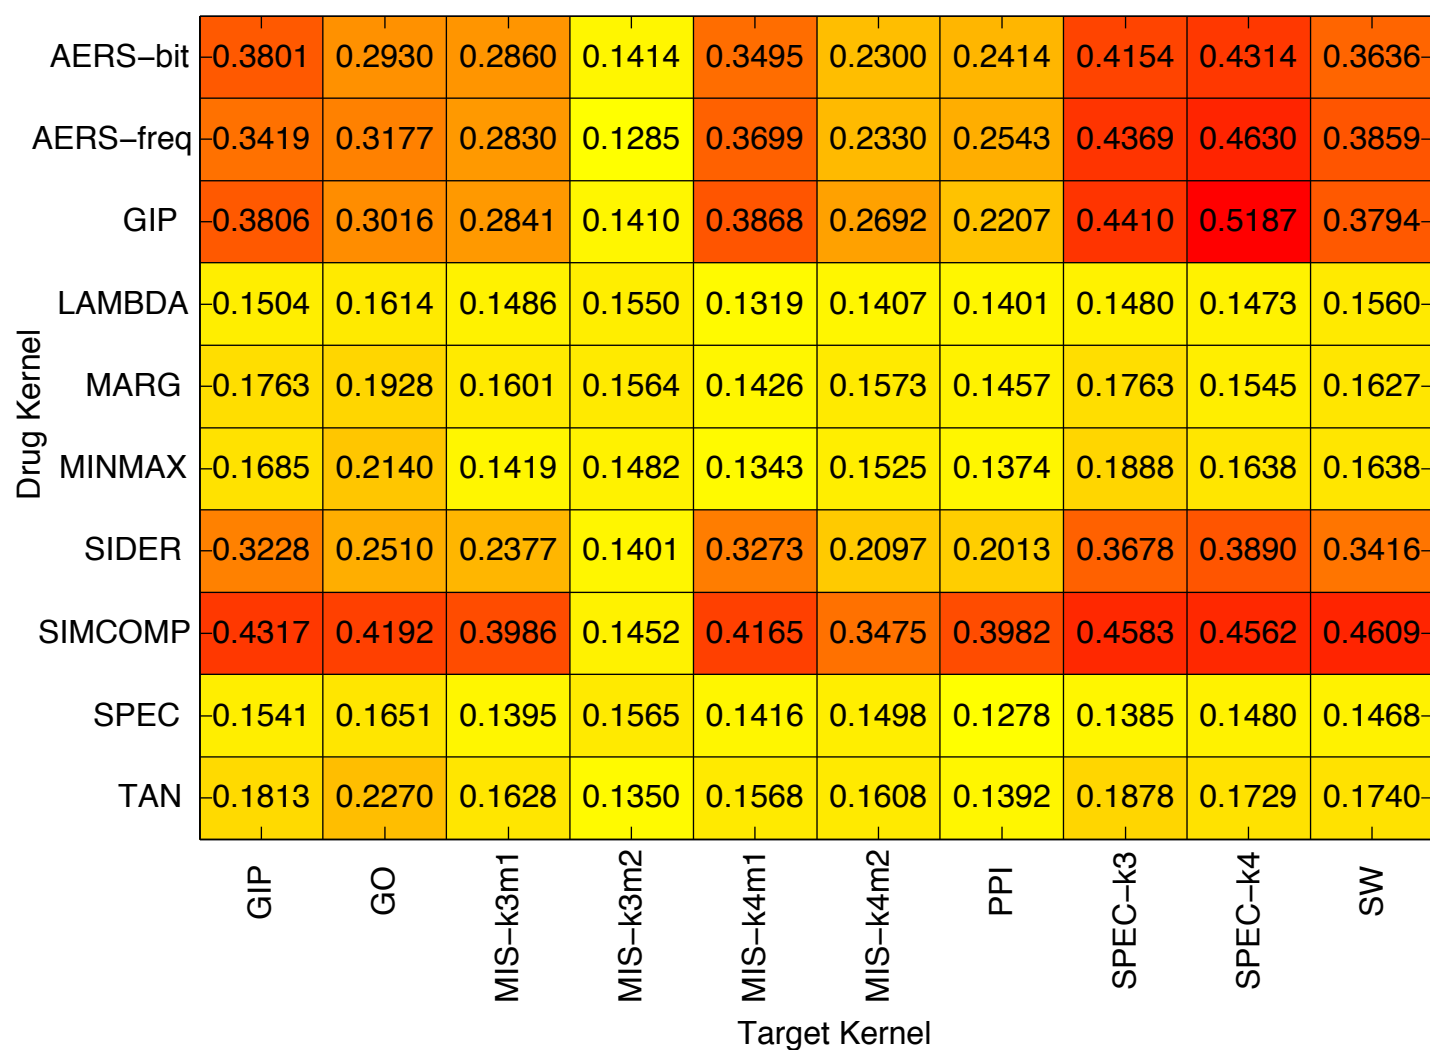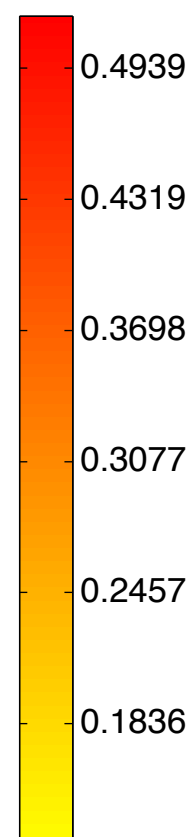

GPCR

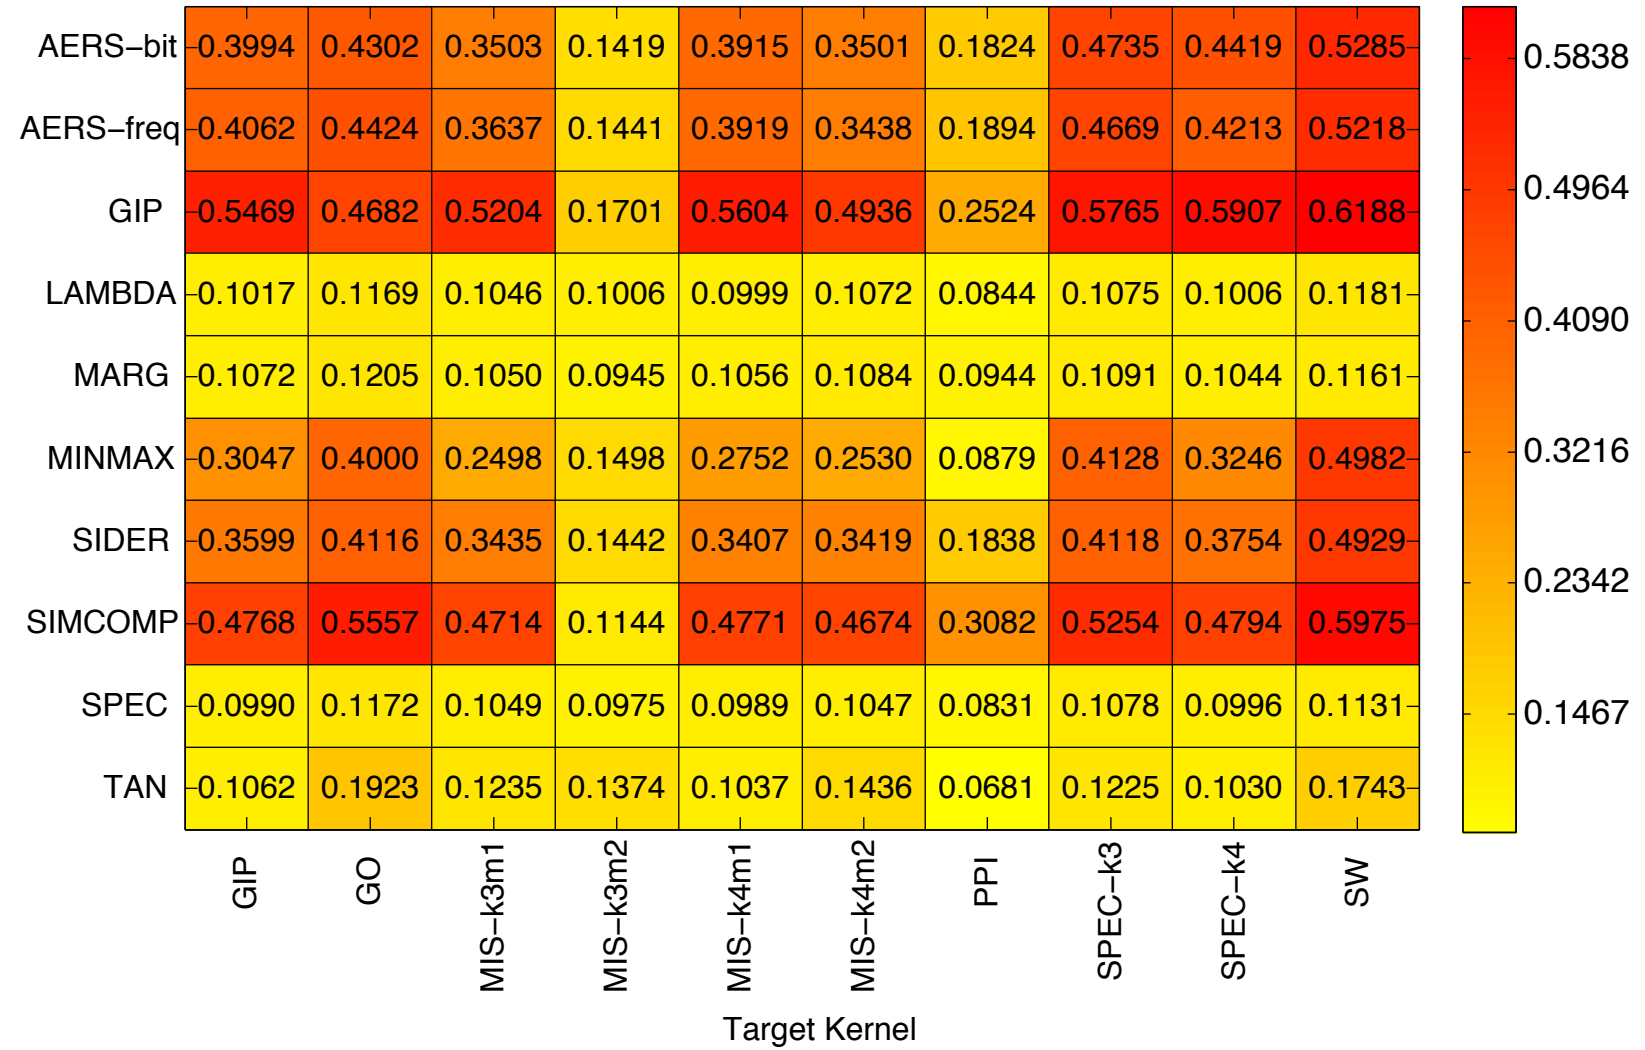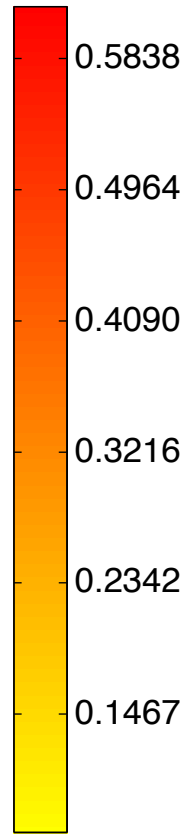

Ion Channel

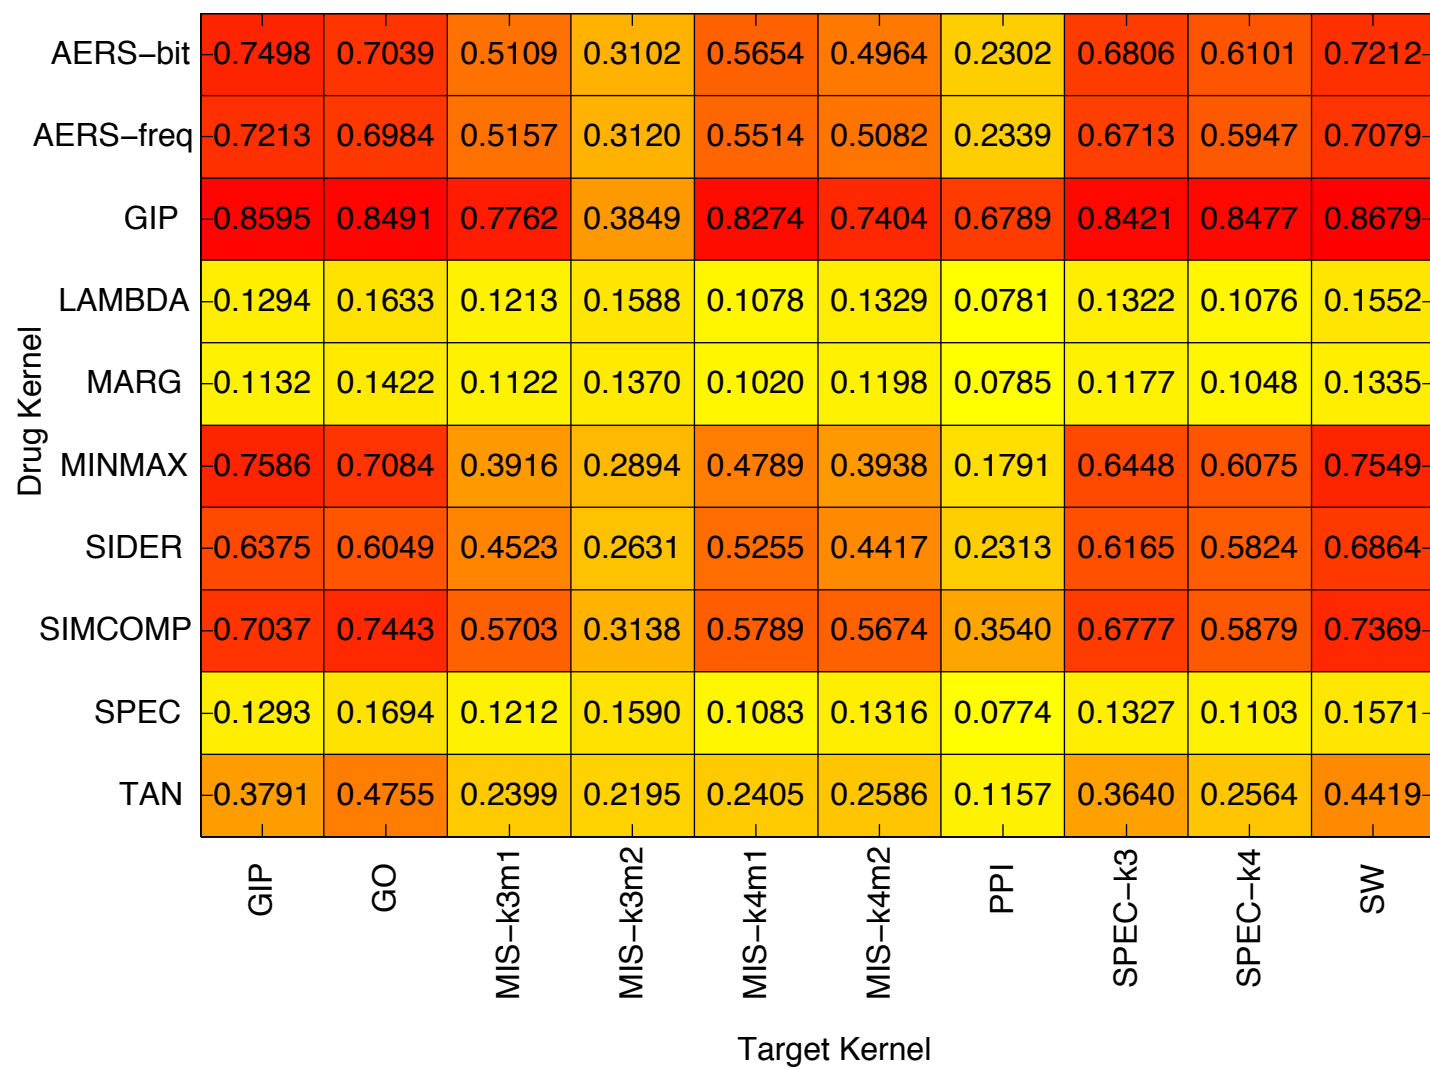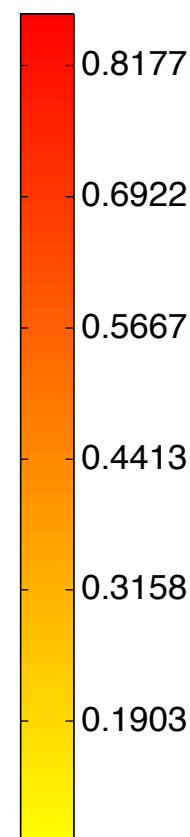

Enzyme

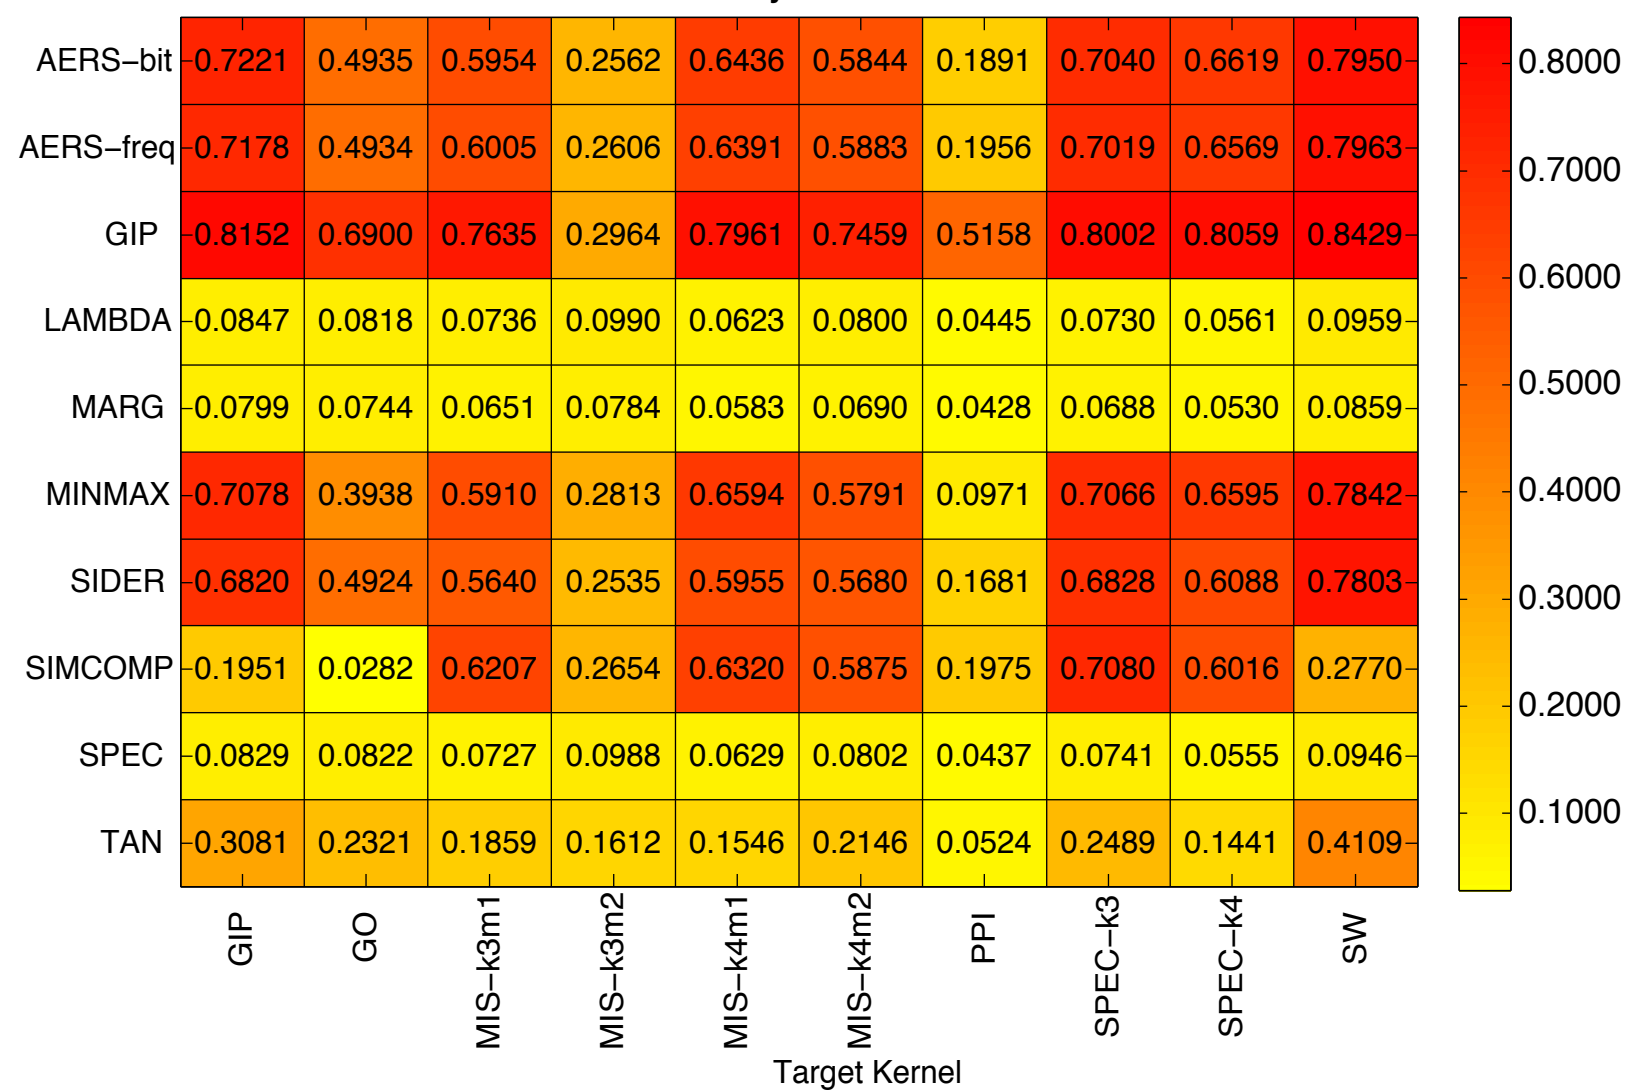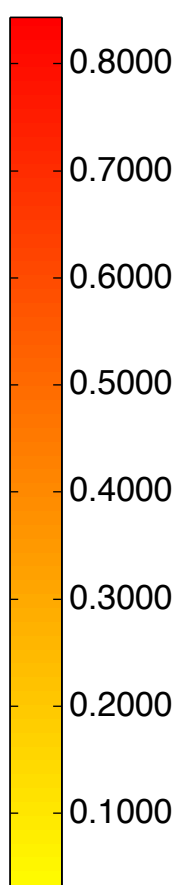

Supplement: 12859_2016_890_MOESM1_ESM.pdf [file 12859_2016_890_MOESM1_ESM.pdf]
