# Supplementary material for: A multiple kernel learning algorithm for drug-target interaction prediction
Source: Springer Nature journal article supplement (doi:10.1186/s12859-016-0890-3), 2016-01-22
Supplement: 12859_2016_890_MOESM3_ESM.pdf [file 12859_2016_890_MOESM3_ESM.pdf]

Table S1: Results of competing methods under pair prediction in the subsampled test sets .

| Dataset  | Combination             | Pairs         |           |
|----------|-------------------------|---------------|-----------|
|          |                         | AUPR          |           |
| NR       | [SPEC-k4]-[AERS-freq] † | 0.7616        | (±0.0205) |
|          | [SPEC-k4]-[GIP] *       | 0.8389        | (±0.0176) |
|          | BLM-KA                  | 0.5069        | (±0.0198) |
|          | BLM-MEAN                | 0.5070        | (±0.0251) |
|          | KBMF2MKL                | 0.6344        | (±0.0163) |
|          | KRONRLS-KA              | 0.8124        | (±0.0281) |
|          | KRONRLS-MEAN            | 0.8088        | (±0.0275) |
|          | KRONRLS-MKL             | <b>0.8197</b> | (±0.0290) |
|          | LAPRLS-KA               | 0.6993        | (±0.0421) |
|          | LAPRLS-MEAN             | 0.6891        | (±0.0504) |
|          | NETLAPRLS-KA            | 0.7075        | (±0.0402) |
|          | NETLAPRLS-MEAN          | 0.7033        | (±0.0453) |
|          | PKM-KA                  | 0.7012        | (±0.0416) |
|          | PKM-MAX                 | 0.5551        | (±0.0263) |
|          | PKM-MEAN                | 0.6982        | (±0.0468) |
| SITAR    | 0.7990                  | (±0.0442)     |           |
| WANG-MKL | 0.7390                  | (±0.0317)     |           |
| GPCR     | [SPEC-k4]-[MINMAX] †    | 0.8703        | (±0.0084) |
|          | [SW]-[GIP] *            | 0.9249        | (±0.0028) |
|          | BLM-KA                  | 0.6416        | (±0.0195) |
|          | BLM-MEAN                | 0.6234        | (±0.0125) |
|          | KBMF2MKL                | 0.8637        | (±0.0098) |
|          | KRONRLS-KA              | 0.9417        | (±0.0039) |
|          | KRONRLS-MEAN            | 0.9398        | (±0.0046) |
|          | KRONRLS-MKL             | 0.9440        | (±0.0040) |
|          | LAPRLS-KA               | 0.8204        | (±0.0086) |
|          | LAPRLS-MEAN             | 0.8206        | (±0.0083) |
|          | NETLAPRLS-KA            | 0.8593        | (±0.0069) |
|          | NETLAPRLS-MEAN          | 0.8604        | (±0.0069) |
|          | PKM-KA                  | 0.8679        | (±0.0083) |
|          | PKM-MAX                 | 0.7602        | (±0.0167) |
|          | PKM-MEAN                | 0.8631        | (±0.0073) |
| SITAR    | <b>0.9470</b>           | (±0.0065)     |           |
| WANG-MKL | 0.9122                  | (±0.0067)     |           |
| IC       | [PPI]-[GIP] †           | 0.9372        | (±0.0049) |
|          | [SW]-[GIP] *            | 0.9815        | (±0.0006) |
|          | BLM-KA                  | 0.7154        | (±0.0122) |
|          | BLM-MEAN                | 0.7049        | (±0.0096) |
|          | KBMF2MKL                | 0.9558        | (±0.0020) |
|          | KRONRLS-KA              | 0.9790        | (±0.0011) |
|          | KRONRLS-MEAN            | 0.9799        | (±0.0008) |
|          | KRONRLS-MKL             | <b>0.9810</b> | (±0.0008) |
|          | LAPRLS-KA               | 0.8721        | (±0.0090) |
|          | LAPRLS-MEAN             | 0.8756        | (±0.0086) |
|          | NETLAPRLS-KA            | 0.9218        | (±0.0035) |
|          | NETLAPRLS-MEAN          | 0.9252        | (±0.0032) |
|          | PKM-KA                  | 0.9459        | (±0.0057) |
|          | PKM-MAX                 | 0.8134        | (±0.0080) |
|          | PKM-MEAN                | 0.9501        | (±0.0051) |
| SITAR    | 0.9779                  | (±0.0021)     |           |
| WANG-MKL | 0.9630                  | (±0.0027)     |           |
| E        | [GO]-[GIP] †            | 0.9632        | (±0.0007) |
|          | [SW]-[GIP] *            | 0.9777        | (±0.0012) |
|          | BLM-KA                  | 0.7481        | (±0.0066) |
|          | BLM-MEAN                | 0.7431        | (±0.0077) |
|          | KBMF2MKL                | 0.9511        | (±0.0019) |
|          | KRONRLS-KA              | 0.9767        | (±0.0007) |
|          | KRONRLS-MEAN            | 0.9777        | (±0.0005) |
|          | KRONRLS-MKL             | 0.9804        | (±0.0007) |
|          | LAPRLS-KA               | 0.9106        | (±0.0032) |
|          | LAPRLS-MEAN             | 0.9068        | (±0.0034) |
|          | NETLAPRLS-KA            | 0.9187        | (±0.0035) |
|          | NETLAPRLS-MEAN          | 0.9158        | (±0.0037) |
|          | PKM-KA                  | 0.9450        | (±0.0040) |
|          | PKM-MAX                 | 0.8648        | (±0.0027) |
|          | PKM-MEAN                | 0.9412        | (±0.0040) |
| SITAR    | <b>0.9885</b>           | (±0.0012)     |           |
| WANG-MKL | 0.9749                  | (±0.0014)     |           |

†best on training \*best on testing

Table S2: AUPR results of predicted scores against new interactions found on current release of KEGG, Matador, Drugbank and ChEMBL databases.

| Dataset  | Combination         | KEGG   | MATADOR | DRUGBANK | ChEMBL |
|----------|---------------------|--------|---------|----------|--------|
| NR       | SINGLE <sup>†</sup> | 0.4122 | 0.0149  | 0.0442   | 0.2537 |
|          | SINGLE*             | 0.2533 | 0.0227  | 0.0389   | 0.2245 |
|          | BLM-KA              | 0.0069 | 0.0063  | 0.0108   | 0.1249 |
|          | BLM-MEAN            | 0.0048 | 0.0028  | 0.0079   | 0.1267 |
|          | KBMF2MKL            | 0.0394 | 0.0075  | 0.0128   | 0.2208 |
|          | KRONRLS-KA          | 0.0599 | 0.0095  | 0.0499   | 0.3246 |
|          | KRONRLS-MEAN        | 0.0410 | 0.0097  | 0.0469   | 0.3238 |
|          | KRONRLS-MKL         | 0.1235 | 0.0091  | 0.0472   | 0.3139 |
|          | LAPRLS-KA           | 0.0133 | 0.0104  | 0.0245   | 0.2949 |
|          | LAPRLS-MEAN         | 0.0133 | 0.0153  | 0.0297   | 0.3135 |
|          | NETLAPRLS-KA        | 0.0182 | 0.0130  | 0.0290   | 0.3071 |
|          | NETLAPRLS-MEAN      | 0.0176 | 0.0126  | 0.0277   | 0.3041 |
|          | NRWRH-KA            | 0.7600 | 0.0105  | 0.0351   | 0.1739 |
|          | NRWRH-MEAN          | 0.7600 | 0.0109  | 0.0365   | 0.1762 |
|          | PKM-MEAN            | 0.0094 | 0.0056  | 0.0358   | 0.2875 |
|          | PKM-KA              | 0.0132 | 0.0113  | 0.0183   | 0.2748 |
|          | PKM-MAX             | 0.0064 | 0.0053  | 0.0120   | 0.1728 |
| WANG-MKL | 0.3403              | 0.0056 | 0.0430  | 0.3429   |        |
| SITAR    | 0.5204              | 0.0068 | 0.0618  | 0.2513   |        |
| GPCR     | SINGLE <sup>†</sup> | 0.0912 | 0.0179  | 0.1481   | 0.2121 |
|          | SINGLE*             | 0.0912 | 0.0179  | 0.1481   | 0.2121 |
|          | BLM-KA              | 0.0118 | 0.0055  | 0.0423   | 0.1551 |
|          | BLM-MEAN            | 0.0116 | 0.0066  | 0.0447   | 0.1499 |
|          | KBMF2MKL            | 0.0586 | 0.0084  | 0.0831   | 0.1690 |
|          | KRONRLS-KA          | 0.0867 | 0.0230  | 0.1769   | 0.2489 |
|          | KRONRLS-MEAN        | 0.0746 | 0.0249  | 0.1880   | 0.2544 |
|          | KRONRLS-MKL         | 0.1085 | 0.0231  | 0.2191   | 0.2256 |
|          | LAPRLS-KA           | 0.0164 | 0.0129  | 0.0641   | 0.2508 |
|          | LAPRLS-MEAN         | 0.0182 | 0.0116  | 0.0656   | 0.2526 |
|          | NETLAPRLS-KA        | 0.0260 | 0.0199  | 0.0975   | 0.2606 |
|          | NETLAPRLS-MEAN      | 0.0269 | 0.0205  | 0.1004   | 0.2606 |
|          | NRWRH-KA            | 0.1555 | 0.0110  | 0.1871   | 0.2000 |
|          | NRWRH-MEAN          | 0.1527 | 0.0109  | 0.1861   | 0.1947 |
|          | PKM-MEAN            | 0.0214 | 0.0377  | 0.0639   | 0.2446 |
|          | PKM-KA              | 0.0252 | 0.0085  | 0.0792   | 0.2361 |
|          | PKM-MAX             | 0.0159 | 0.0134  | 0.0360   | 0.1682 |
| WANG-MKL | 0.0691              | 0.0249 | 0.1651  | 0.2469   |        |
| SITAR    | 0.1536              | 0.0097 | 0.2289  | 0.1997   |        |
| IC       | SINGLE <sup>†</sup> | 0.0905 | 0.0234  | 0.0557   | 0.0409 |
|          | SINGLE*             | 0.0905 | 0.0234  | 0.0557   | 0.0409 |
|          | BLM-KA              | 0.0125 | 0.0131  | 0.0184   | 0.0219 |
|          | BLM-MEAN            | 0.0126 | 0.0127  | 0.0174   | 0.0171 |
|          | KBMF2MKL            | 0.0419 | 0.0255  | 0.0457   | 0.0421 |
|          | KRONRLS-KA          | 0.0714 | 0.0348  | 0.0472   | 0.0399 |
|          | KRONRLS-MEAN        | 0.0618 | 0.0275  | 0.0369   | 0.0363 |
|          | KRONRLS-MKL         | 0.0723 | 0.0261  | 0.0462   | 0.0403 |
|          | LAPRLS-KA           | 0.0105 | 0.0258  | 0.0151   | 0.0315 |
|          | LAPRLS-MEAN         | 0.0106 | 0.0256  | 0.0152   | 0.0316 |
|          | NETLAPRLS-KA        | 0.0221 | 0.0261  | 0.0217   | 0.0301 |
|          | NETLAPRLS-MEAN      | 0.0231 | 0.0257  | 0.0223   | 0.0300 |
|          | NRWRH-KA            | 0.1585 | 0.0255  | 0.0987   | 0.0272 |
|          | NRWRH-MEAN          | 0.1646 | 0.0254  | 0.1063   | 0.0271 |
|          | PKM-MEAN            | 0.0285 | 0.0238  | 0.0275   | 0.0455 |
|          | PKM-KA              | 0.0228 | 0.0218  | 0.0239   | 0.0631 |
|          | PKM-MAX             | 0.0080 | 0.0095  | 0.0134   | 0.0140 |
| WANG-MKL | 0.0941              | 0.0438 | 0.0441  | 0.0595   |        |
| SITAR    | 0.0983              | 0.0264 | 0.0599  | 0.0319   |        |
| E        | SINGLE <sup>†</sup> | 0.0058 | 0.0621  | 0.0513   | 0.0422 |
|          | SINGLE*             | 0.0058 | 0.0621  | 0.0513   | 0.0422 |
|          | BLM-KA              | 0.0047 | 0.0451  | 0.0116   | 0.0272 |
|          | BLM-MEAN            | 0.0049 | 0.0456  | 0.0118   | 0.0273 |
|          | KBMF2MKL            | 0.0034 | 0.0570  | 0.0311   | 0.0556 |
|          | KRONRLS-KA          | 0.0084 | 0.0666  | 0.0325   | 0.0385 |
|          | KRONRLS-MEAN        | 0.0063 | 0.0652  | 0.0376   | 0.0432 |
|          | KRONRLS-MKL         | 0.0106 | 0.0638  | 0.0445   | 0.0335 |
|          | LAPRLS-KA           | 0.0008 | 0.0041  | 0.0183   | 0.0599 |
|          | LAPRLS-MEAN         | 0.0007 | 0.0038  | 0.0179   | 0.0581 |
|          | NETLAPRLS-KA        | 0.0070 | 0.0354  | 0.0247   | 0.0641 |
|          | NETLAPRLS-MEAN      | 0.0070 | 0.0351  | 0.0241   | 0.0620 |
|          | NRWRH-KA            | 0.0125 | 0.0121  | 0.0268   | 0.0402 |
|          | NRWRH-MEAN          | 0.0098 | 0.0123  | 0.0247   | 0.0419 |
|          | PKM-MEAN            | 0.0001 | 0.0013  | 0.0024   | 0.0155 |
|          | PKM-KA              | 0.0001 | 0.0012  | 0.0028   | 0.0156 |
|          | PKM-MAX             | 0.0001 | 0.0009  | 0.0028   | 0.0180 |
| WANG-MKL | 0.0001              | 0.0011 | 0.0025  | 0.0137   |        |
| SITAR    | 0.0006              | 0.0045 | 0.0322  | 0.0403   |        |

<sup>†</sup>best on training \*best on testing

Table S3: Average memory (MB) usage during training and testing of competing methods.

| Dataset  | Combination    | Pairs   | Targets | Drugs   |
|----------|----------------|---------|---------|---------|
| NR       | BLM-KA         | 383.00  | 359.80  | 356.80  |
|          | BLM-MEAN       | 380.00  | 363.20  | 362.00  |
|          | KBMF2MKL       | 358.40  | 362.00  | 372.20  |
|          | KRONRLS-KA     | 367.00  | 355.60  | 356.60  |
|          | KRONRLS-MEAN   | 356.40  | 360.00  | 363.80  |
|          | KRONRLS-MKL    | 388.20  | 383.20  | 385.60  |
|          | LAPRLS-KA      | 367.60  | 367.00  | 360.80  |
|          | LAPRLS-MEAN    | 358.60  | 364.00  | 359.60  |
|          | NETLAPRLS-KA   | 384.67  | 365.80  | 359.80  |
|          | NETLAPRLS-MEAN | 360.20  | 359.80  | 360.60  |
|          | NRWRH-KA       | -       | 358.60  | 358.60  |
|          | NRWRH-MEAN     | -       | 357.00  | 361.60  |
|          | PKM-KA         | 359.40  | 358.00  | 355.60  |
|          | PKM-MAX        | 358.20  | 355.00  | 360.80  |
|          | PKM-MEAN       | 358.80  | 358.60  | 358.60  |
| SITAR    | 370.40         | 373.20  | 369.20  |         |
| WANG-MKL | 381.20         | 384.80  | 383.40  |         |
| GPCR     | BLM-KA         | 584.80  | 488.00  | 542.40  |
|          | BLM-MEAN       | 581.20  | 514.20  | 462.40  |
|          | KBMF2MKL       | 372.80  | 497.00  | 507.20  |
|          | KRONRLS-KA     | 370.40  | 563.20  | 570.80  |
|          | KRONRLS-MEAN   | 365.60  | 484.40  | 417.60  |
|          | KRONRLS-MKL    | 397.60  | 512.40  | 577.00  |
|          | LAPRLS-KA      | 415.40  | 403.20  | 512.60  |
|          | LAPRLS-MEAN    | 499.60  | 440.00  | 454.40  |
|          | NETLAPRLS-KA   | 370.60  | 382.40  | 381.20  |
|          | NETLAPRLS-MEAN | 368.60  | 386.20  | 376.20  |
|          | NRWRH-KA       | -       | 438.80  | 473.20  |
|          | NRWRH-MEAN     | -       | 465.60  | 462.40  |
|          | PKM-KA         | 541.80  | 496.80  | 545.20  |
|          | PKM-MAX        | 512.60  | 635.80  | 600.40  |
|          | PKM-MEAN       | 525.60  | 617.80  | 522.00  |
| SITAR    | 450.40         | 428.80  | 490.60  |         |
| WANG-MKL | 550.60         | 576.60  | 525.40  |         |
| IC       | BLM-KA         | 946.00  | 575.80  | 552.00  |
|          | BLM-MEAN       | 879.40  | 502.60  | 612.60  |
|          | KBMF2MKL       | 517.80  | 521.40  | 522.40  |
|          | KRONRLS-KA     | 476.20  | 469.80  | 469.00  |
|          | KRONRLS-MEAN   | 457.60  | 459.00  | 580.00  |
|          | KRONRLS-MKL    | 565.40  | 547.40  | 654.00  |
|          | LAPRLS-KA      | 497.00  | 417.00  | 544.80  |
|          | LAPRLS-MEAN    | 484.20  | 491.20  | 467.20  |
|          | NETLAPRLS-KA   | 384.40  | 382.40  | 381.20  |
|          | NETLAPRLS-MEAN | 380.00  | 386.20  | 376.20  |
|          | NRWRH-KA       | -       | 376.00  | 487.80  |
|          | NRWRH-MEAN     | -       | 375.80  | 504.60  |
|          | PKM-KA         | 813.40  | 677.60  | 723.80  |
|          | PKM-MAX        | 788.80  | 680.20  | 855.40  |
|          | PKM-MEAN       | 805.40  | 695.60  | 861.00  |
| SITAR    | 540.40         | 384.80  | 567.80  |         |
| WANG-MKL | 809.20         | 863.20  | 855.60  |         |
| E        | BLM-KA         | 3411.00 | 921.40  | 1021.20 |
|          | BLM-MEAN       | 3604.20 | 915.40  | 996.40  |
|          | KBMF2MKL       | 861.80  | 716.80  | 834.00  |
|          | KRONRLS-KA     | 734.80  | 675.60  | 784.80  |
|          | KRONRLS-MEAN   | 661.40  | 818.20  | 698.20  |
|          | KRONRLS-MKL    | 844.40  | 816.80  | 717.40  |
|          | LAPRLS-KA      | 641.20  | 705.60  | 709.40  |
|          | LAPRLS-MEAN    | 668.20  | 701.20  | 668.60  |
|          | NETLAPRLS-KA   | 562.60  | 567.80  | 576.80  |
|          | NETLAPRLS-MEAN | 542.60  | 549.40  | 575.60  |
|          | NRWRH-KA       | -       | 645.60  | 642.80  |
|          | NRWRH-MEAN     | -       | 691.60  | 728.20  |
|          | PKM-KA         | 4899.20 | 4985.20 | 5220.20 |
|          | PKM-MAX        | 5048.20 | 4997.00 | 5195.40 |
|          | PKM-MEAN       | 4976.80 | 4891.60 | 5194.20 |
| SITAR    | 789.80         | 598.00  | 741.40  |         |
| WANG-MKL | 4990.40        | 5090.60 | 5121.60 |         |

Table S4: Average computing time in minutes for training and testing the model in all four datasets (ranking of each method is given in parenthesis).

| METHOD         | PAIRS       | TARGETS     | DRUGS       |
|----------------|-------------|-------------|-------------|
| BLM-KA         | 340.32 (15) | 54.25 (13)  | 24.68 (10)  |
| BLM-MEAN       | 299.60 (14) | 39.95 (12)  | 16.24 (5)   |
| KBMF-MKL       | 105.17 (11) | 110.34 (15) | 114.30 (15) |
| KRONRLS-KA     | 21.17 (7)   | 21.53 (6)   | 21.39 (8)   |
| KRONRLS-MEAN   | 20.39 (6)   | 21.51 (5)   | 21.34 (7)   |
| KRONRLS-MKL    | 74.00 (10)  | 92.82 (14)  | 93.25 (14)  |
| LAPRLS-KA      | 27.11 (8)   | 33.82 (9)   | 33.80 (13)  |
| LAPRLS-MEAN    | 30.28 (9)   | 33.40 (8)   | 33.37 (12)  |
| NETLAPRLS-KA   | 135.20 (13) | 134.64 (17) | 134.98 (17) |
| NETLAPRLS-MEAN | 132.16 (12) | 132.65 (16) | 132.75 (16) |
| NRWRH-KA       | -           | 39.90 (11)  | 30.09 (11)  |
| NRWRH-MEAN     | -           | 38.36 (10)  | 23.03 (9)   |
| PKM-KA         | 0.63 (3)    | 0.95 (4)    | 0.64 (3)    |
| PKM-MAX        | 0.55 (2)    | 0.93 (3)    | 0.61 (2)    |
| PKM-MEAN       | 0.54 (1)    | 0.84 (2)    | 0.54 (1)    |
| SITAR          | 15.54 (5)   | 22.59 (7)   | 16.30 (6)   |
| WANG-MKL       | 0.82 (4)    | 0.80 (1)    | 0.68 (4)    |
